# Supplementary material
Source: HighWire-hosted journal article supplement (https://jnnp.bmj.com/content/92/1/36)
Supplement: inline-supplementary-material-1 [file inline-supplementary-material-1.pdf]

---

**Appendix 1** Online database search strategies (performed on 1<sup>st</sup> of June 2020).**MEDLINE search strategy which yielded 306 results:**

1. Conversion Disorder/
2. (functional neurolog\* or (conversion adj disorder\*) or (conversion adj syndrome\*) or (conversion adj hyster\*) or (psychogenic adj3 seizure\*) or (dissociative adj3 seizure) or (unexplained adj neurolog\*) or "non-epileptic" or nonepileptic or "non-organic").mp.
3. 1 or 2
4. psychotherapy/ or exp behavior therapy/ or exp emotion-focused therapy/ or narrative therapy/ or person-centered therapy/ or exp psychoanalytic therapy/ or exp psychotherapeutic processes/ or psychotherapy, brief/ or psychotherapy, multiple/ or psychotherapy, psychodynamic/ or psychotherapy, rational-emotive/
5. Psychoanalysis/
6. (psychotherapy or cognitive therap\* or (behavior\* adj therap\*) or (behaviour\* adj therap\*) or psychodynamic or psychoanal\* or psycho-anal\* or interpersonal).mp.
7. 4 or 5 or 6
8. 3 and 7

**Embase search strategy which yielded 640 results:**

1. \*psychotherapy/
2. exp \*behavior therapy/ or exp \*cognitive behavioral therapy/ or exp \*cognitive therapy/ or \*emotion-focused therapy/ or \*psychodynamic psychotherapy/ or \*rational emotive behavior therapy/ or \*short term psychotherapy/
3. \*psychoanalysis/
4. (psychotherapy or cognitive therap\* or (behavior\* adj therap\*) or (behaviour\* adj therap\*) or psychodynamic or psychoanal\* or psycho-anal\* or interpersonal).mp.
5. 1 or 2 or 3 or 4
6. exp conversion disorder/
7. psychogenic nonepileptic seizure/
8. (functional neurolog\* or (conversion adj disorder\*) or (conversion adj syndrome\*) or (conversion adj hyster\*) or (psychogenic adj3 seizure\*) or (dissociative adj3 seizure) or (unexplained adj neurolog\*) or "non-epileptic" or nonepileptic or "non-organic").mp.
9. 6 or 7 or 8
10. 5 and 9

**PsycINFO search strategy which yielded 366 results:**

1. exp psychotherapy/
  2. cognitive therapy/
  3. (psychotherapy or cognitive therap\* or (behavior\* adj therap\*) or (behaviour\* adj therap\*) or psychodynamic or psychoanal\* or psycho-anal\* or interpersonal).m\_titl.
  4. 1 or 2 or 3
  5. exp conversion disorder/
  6. (functional neurolog\* or (conversion adj disorder\*) or (conversion adj syndrome\*) or (conversion adj hyster\*) or (psychogenic adj3 seizure\*) or (dissociative adj3 seizure) or (unexplained adj neurolog\*) or "non-epileptic" or nonepileptic or "non-organic").mp. [mp=title, abstract, heading word, table of contents, key concepts, original title, tests & measures]
  7. 5 or 6
  8. 4 and 7
  9. limit 8 to (english language and yr="1980 -Current")
-
